# Supplementary material for: The impact of social protection and poverty elimination on global tuberculosis incidence: a statistical modelling analysis of Sustainable Development Goal 1
Source: PubMed Central journal article supplement — Lancet Glob Health. 2018 Mar 23;6(5):e514–22. doi: 10.1016/S2214-109X(18)30195-5 (PMC5968370; doi:10.1016/s2214-109x(18)30195-5), 2018-03-23
Supplement: mmc1.pdf [file mmc1.pdf]

# THE LANCET

## Global Health

### Supplementary appendix

This appendix formed part of the original submission and has been peer reviewed. We post it as supplied by the authors.

Supplement to: Carter DJ, Glaziou P, Lönnroth K, et al. The impact of social protection and poverty elimination on global tuberculosis incidence: a statistical modelling analysis of Sustainable Development Goal 1. *Lancet Glob Health* 2018; published online March 23. [http://dx.doi.org/10.1016/S2214-109X\(18\)30195-5](http://dx.doi.org/10.1016/S2214-109X(18)30195-5).

## 635 Appendix 1 –PCA

636 To examine relationships between selected variables, a PCA was performed after conducting a single  
 637 imputation by region using the regression substitution method. Five imputations of the dataset were  
 638 generated using multiple imputation by chained equations and the data used to generate this biplot  
 639 comes from a randomly selected imputed dataset.<sup>20</sup> Smoking and diabetes cluster together and not  
 640 using clean fuels and living in an urban slum also cluster together, informing a decision to combine  
 641 variables. Extreme poverty and MPI poverty are also closely related, suggesting they may be collinear.  
 642 Both are quite closely related to TB incidence, as expected. Malnutrition is also quite strongly related to  
 643 TB incidence. Social insurance is negatively correlated with TB incidence as expected, and closely  
 644 associated with regions with high and middle income countries.  
 645

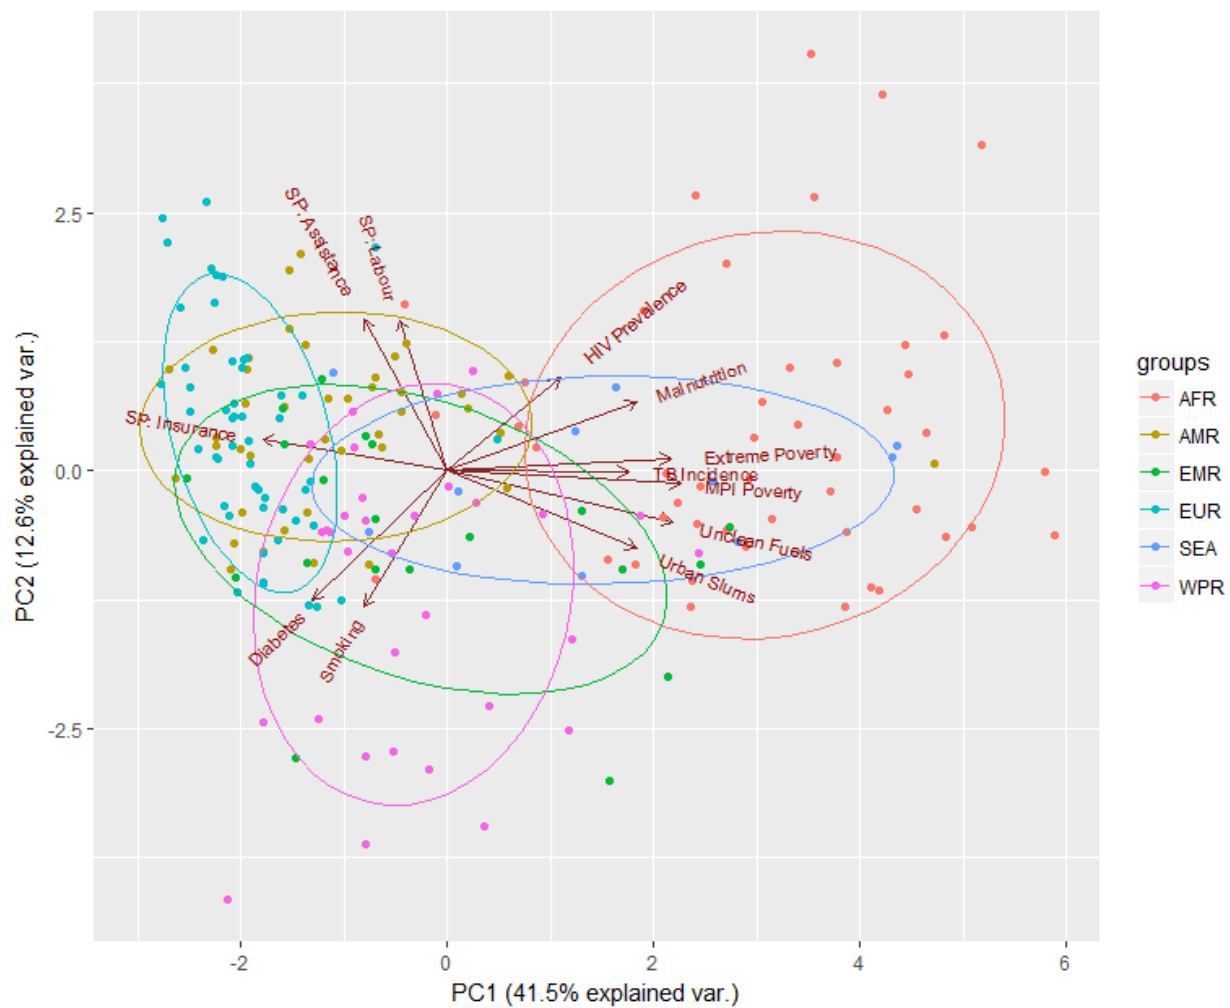

646

647

648 **Figure A.** Biplot of the first two principal components of variables in the conceptual framework. Closeness of the  
649 arrows indicates the degree of correlation between the variables. The direction of the arrows points in the  
650 direction of increasing values of that variable. Ellipses represent groupings by WHO region.

651

652

653

## 654 Appendix 2 - Missing Data

655

656 Table A presents the level of missingness in the data prior to the multiple imputation procedure. The  
 657 multiple imputation procedure works by running iterated regression analyses, taking one variable as the  
 658 outcome variable and the remaining variables in the dataset as the predictor variables. Doing this for all  
 659 variables results in a set of predicted values (imputed values) for each missing value <sup>20</sup>. Repeating this  
 660 procedure multiple times provides multiple datasets with no missing data which are pooled together to  
 661 perform analyses.

662

663 The advantage of undertaking this procedure is that the imputed values for a given country closely  
 664 resemble values for countries with similar characteristics in the other variables, and are thus more likely  
 665 to accurately reflect possible values of the missing data. Doing this multiple times ensures convergence  
 666 on a reasonable value. In this dataset, missingness on social insurance and missingness on absolute  
 667 poverty was not associated with any of the four proximal TB risk factors, nor was it associated with WHO  
 668 region.

669

670

671

| Subtarget Indicator Measures                         | % missing data |
|------------------------------------------------------|----------------|
| SDG 1.1: Absolute Poverty                            | 42.0%          |
| SDG 1.2: Multidimensional Poverty Index (prevalence) | 52.2%          |
| SDG 1.3: Labour Market Social Protection             | 71.7%          |
| SDG 1.3: Social Assistance                           | 48.3%          |
| SDG 1.3: Social Insurance                            | 49.3%          |
|                                                      |                |
| Poverty Subconstruct Measures                        | % missing data |
| Malnourished %                                       | 0.01%          |
| HIV Prevalence                                       | 22.9%          |
| Health Behaviours                                    | 39.0%          |
| Housing Quality                                      | 54.6%          |

672 **Table A.** Proportion of missing data for each subtarget indicator and for each measure of poverty. Missingness in  
 673 the context of these data is that there was no recorded value after 2010.

## 674 Appendix 3 – Mediators

675

676 A simple analysis for mediation was performed by adjusting the estimate for the linear relationship  
 677 between SDG 1 and TB for each of the risk factors in turn. Evidence for mediation is determined by the  
 678 degree of change in the relationship between SDG 1 and TB is adjusted for with the risk factor under  
 679 examination. All risk factors will show a degree of mediation for extreme poverty and social insurance.  
 680

| Indicator                  |                   | Crude           | Adjusted        | Mediation? |
|----------------------------|-------------------|-----------------|-----------------|------------|
| SDG 1.1: Extreme Poverty   | Malnutrition      | <b>3.23***</b>  | <b>2.29***</b>  | Moderate   |
|                            | HIV               | <b>3.23***</b>  | <b>1.99***</b>  | Moderate   |
|                            | Health Behaviours | <b>3.23***</b>  | <b>4.67***</b>  | Moderate   |
|                            | Housing Quality   | <b>3.23***</b>  | 2.43            | Moderate   |
|                            |                   |                 |                 |            |
| SDG 1.2: MPI Prevalence    | Malnutrition      | <b>1.94***</b>  | <b>1.17*</b>    | Weak       |
|                            | Health Behaviours | <b>1.94***</b>  | <b>2.32**</b>   | Weak       |
|                            | Housing Quality   | <b>1.94***</b>  | -1.44           | Strong     |
|                            |                   |                 |                 |            |
| SDG 1.3: Social Assistance | Malnutrition      | -0.81           | -0.49           | Weak       |
|                            | Housing Quality   | -0.81           | 0.38            | Moderate   |
|                            |                   |                 |                 |            |
| SDG 1.3: Social Insurance  | Malnutrition      | <b>-3.73***</b> | <b>-2.79**</b>  | Moderate   |
|                            | HIV               | <b>-3.73***</b> | <b>-2.00**</b>  | Moderate   |
|                            | Health Behaviours | <b>-3.73***</b> | <b>-4.98***</b> | Moderate   |
|                            | Housing Quality   | <b>-3.73***</b> | -1.90           | Strong     |

681 Stars indicate significant difference of coefficient from 0: \*\*\*p < 0.001, \*\* p < .01, \* p < .05

682 **Table B.** Effect estimates for SDG indicators and TB incidence adjusting for a sole mediator, where included  
683 mediators are associated with the SDG indicator in question and TB incidence (Table X; Figure B). Pathways are  
684 assumed independent.

685

686

687

688  
689  
690  
691  
692  
693  
694  
695  
696  
697  
698  
699  
700  
701  
702  
703  
704  
705  
706  
707

#### Appendix 4 – Income Analyses

GDP per capita and the Gini coefficient were entered into the multiple imputation model and included as a covariate in the adjusted linear models used for mediation analysis as a sensitivity analysis. Neither GDP nor Gini coefficient had a strong association with TB incidence adjusting for the four TB risk factors. However, adjustment for the Gini coefficient resulted in a loss of conventional statistical significance for the health behaviour pathway, and a gain of conventional statistical significance for the social insurance pathway though the direction and magnitude of effect are still consistent with the prior results without income adjustment. This loss of conventional statistical significance is expected given the higher prevalence of both smoking and diabetes in high and middle-income countries that is likely captured in part by GDP. This result is not unexpected as GDP and Gini coefficient are likely to be distal (upstream) drivers of the four more proximal risk factors and thus some of the association of TB with smoking and diabetes may be accounted for in adjustment for GDP and Gini. As the direction and magnitude of effect still hold, we conclude that even after adjustment for income effects, health behaviour is likely to remain a mediator of the relationship between the SDG subtargets and TB. The results may indicate that the health behaviour pathway is responsible for less of the total effect of the SDG subtargets and TB than malnutrition, HIV, or housing quality.

| Association with TB Incidence<br>(adjusting additionally for GDP per capita and Gini coefficient) |                                                                       |
|---------------------------------------------------------------------------------------------------|-----------------------------------------------------------------------|
| Indicator                                                                                         | Adjusted Estimate (more and equally proximal;<br>blue & orange layer) |
| SDG 1.1: Extreme Poverty                                                                          | 0.87 (-0.89, 2.64)                                                    |
| SDG 1.2: MPI Prevalence                                                                           | -0.35 (-2.13, 1.44)                                                   |
| SDG 1.3: Labour Protection                                                                        | -1.09 (-4.58, 2.41)                                                   |
| SDG 1.3: Social Assistance                                                                        | -0.09 (-0.87, 0.69)                                                   |
| SDG 1.3: Social Insurance                                                                         | <b>-1.52 (-2.84, -0.20)</b>                                           |
|                                                                                                   |                                                                       |
| Income Covariate                                                                                  | Adjusted Estimate                                                     |
| GDP per capita (in 1000s)                                                                         | -1.36 (-2.60, 0.12)                                                   |
| Gini Coefficient                                                                                  | 0.29 (-2.37, 2.94)                                                    |

| Measure          | Adjusted Estimate           |
|------------------|-----------------------------|
| Malnourishment   | <b>2.75 (0.64, 4.85)</b>    |
| Health Behaviour | 2.49 (-0.48, 5.45)          |
| Housing Quality  | <b>1.54 (0.55, 2.54)</b>    |
| HIV Prevalence   | <b>20.44 (13.25, 27.63)</b> |

708 Bold indicates significant difference of coefficient from 0 with  $p < .05$

709 **Table C.** The association between each indicator or measure and TB incidence per 100,000 per year. The adjusted  
710 estimate represents the association adjusted for all variables more or equally proximal to TB incidence as well as  
711 GDP per capita and Gini coefficient for a pooling of 50 datasets from a multiple imputation procedure.

712

713

714



715 Appendix 5 – Sensitivity Analyses to Modelling Assumptions for selected pathways  
 716 Complete results from the model at 50% coverage of social protection (an increase of ~30% from baseline) and 90%  
 717 elimination of extreme poverty (an increase of ~10% from baseline) are presented in Table D. There remains a  
 718 substantial decrease in TB incidence predicted even from partial attainment of one or both of the SDG subtargets.  
 719  
 720 Results from producing projections for 2035 incidence using only countries with complete information for social  
 721 insurance and extreme poverty (n = 94) are presented in Table E. The estimates are broadly similar to the  
 722 estimates produced with multiple imputation, but with wider credible intervals – this is expected given the  
 723 reduced power from decreased sample size, but also because of the exponential component of the model. The  
 724 upper bound of the credible interval, if close to baseline, will decrease much less rapidly than its lower bound  
 725 counterpart.

726  
727  
728

**Table D. Projected impact on 2035 TB incidence by mid-level achievement of selected subtargets**

| Pathway                                                                           | $\beta$<br>(95%<br>Confidence<br>Intervals) | Estimated<br>2035<br>Incidence<br>(/100,000) | 95% Credible<br>Interval<br>(/100,000) | Reduction from<br>Baseline*<br>(95% CIs) | Expected Annual<br>Proportional<br>Decline |
|-----------------------------------------------------------------------------------|---------------------------------------------|----------------------------------------------|----------------------------------------|------------------------------------------|--------------------------------------------|
| <i>Pathway A:</i><br>Social Protection for All<br>(50% coverage)                  | -2.13<br>(-3.36, -0.90)                     | 69.6 cases                                   | (50.9, 94.8)<br>cases                  | 41.6%<br>(20.5%, 57.3%)                  | 3.3%                                       |
| <i>Pathway C:</i><br>Extreme Poverty<br>Elimination<br>(90% Eliminated)           | -2.37<br>(-3.64, -1.10)                     | 97.6 cases                                   | (89.0, 110.1)<br>cases                 | 18.1%<br>(7.6%, 25.3%)                   | 1.3%                                       |
| <i>Pathway A &amp; Pathway C:</i><br>Social Protection and<br>Poverty Elimination | ---                                         | 56.7 cases                                   | (36.9, 86.2)<br>cases                  | 52.5%<br>(27.7%, 69.6%)                  | 4.6%                                       |

729  
730 **Table D.** The projected TB incidence per 100,000 per year associated with the achievement of selected SDG 1  
731 subtargets independent from the other targets – 50% social protection coverage and 90% extreme poverty  
732 elimination.

733  
734

**Table E. Projected impact on 2035 TB incidence: Complete cases**

| Pathway                                        | $\beta$<br>(95%<br>Confidence<br>Intervals) | Estimated<br>2035<br>Incidence<br>(/100,000) | 95% Credible<br>Interval<br>(/100,000) | Reduction from<br>Baseline*<br>(95% CIs) | Expected Annual<br>Proportional<br>Decline |
|------------------------------------------------|---------------------------------------------|----------------------------------------------|----------------------------------------|------------------------------------------|--------------------------------------------|
| <i>Pathway A:</i><br>Social Protection for All | -2.66<br>(-4.36, -0.95)                     | 76.7 cases                                   | (57.8, 101.6)<br>cases                 | 35.6%<br>(14.8%, 51.6%)                  | 2.7%                                       |

(100% coverage)

|                                                     |                |            |              |                |       |
|-----------------------------------------------------|----------------|------------|--------------|----------------|-------|
| <i>Pathway C:</i>                                   | -2.01          | 30.9 cases | (7.8, 112.5) | 74.0%          | 8.2%  |
| Extreme Poverty<br>Elimination<br>(100% Eliminated) | (-3.96, -0.08) |            | cases        | (5.6%, 93.5%)  |       |
| <i>Pathway A &amp; Pathway C:</i>                   | ---            | 19.3 cases | (3.4, 95.8)  | 83.8%          | 10.9% |
| Social Protection and<br>Poverty Elimination        |                |            | cases        | (19.7%, 97.2%) |       |

735

736

737

738

739

740

741

742

743

744

745

746

**Table E.** The projected TB incidence per 100,000 per year associated with the achievement of selected SDG 1 subtargets – 100% social protection coverage and 100% extreme poverty elimination. These numbers are from a data subset with complete information on social insurance and extreme poverty.
